# Supplementary material for: Transcription Coactivator ANGUSTIFOLIA3 (AN3) Regulates Leafy Head Formation in Chinese Cabbage
Source: PubMed Central journal article supplement (PMC6502973; doi:10.3389/fpls.2019.00520), 2019-04-30
Supplement: Image_1.pdf [file Image_1.pdf]

**Figure S1. Comparison of the homologs of the AtBRM protein in *Brassica rapa*, *B. oleracea*, *Zea mays*, and *Oryza sativa*.**

(A) Phylogenetic relationship and gene structures of the homologs of the AtBRM protein in those species. The unrooted phylogenetic tree was generated by the neighbor-joining method using the MEGA5 program with 1,000 bootstraps. Lines represent the introns while solid boxes represent exons. (B) Comparison of the deduced amino acid sequences of the homologs of the AtBRM protein in those species.

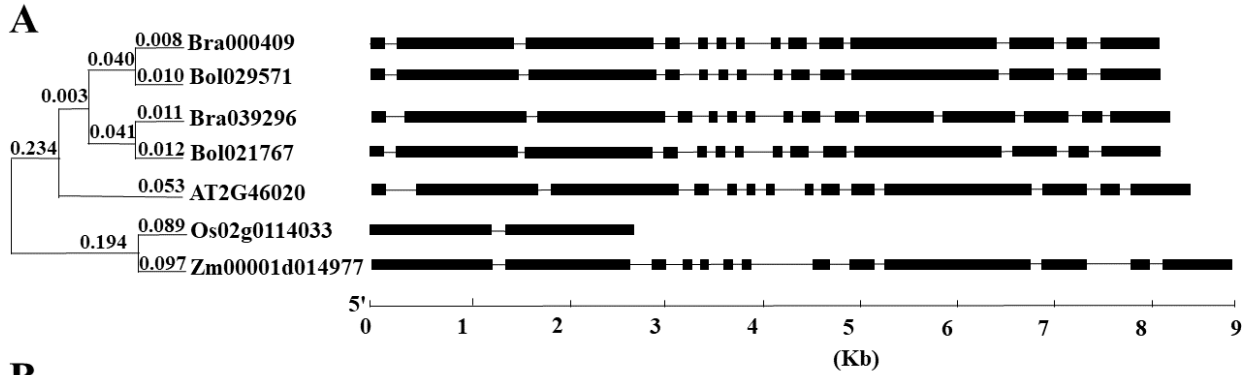

**B**

|                |                                                                    |     |
|----------------|--------------------------------------------------------------------|-----|
| Bra000409      | MQSGGSGGGPARNPGMGPGGRTNSTSSAASPSSSSSVQQQQQ-----LASRQQ              | 50  |
| Bol029571      | .....Q-----                                                        | 51  |
| Bra039296      | .....HLA-----SRQ..                                                 | 50  |
| Bol021767      | .L.....--...A.....T.....Q-----LASR.                                | 48  |
| AT2G46020      | .....A...A...A.....QQQQQQQQQLASRQ..                                | 60  |
| Os02g0114033   | -----MQP.EAPPSSGG.P.T..RPPPAVA.G...LG-----FRNQA                    | 37  |
| Zm00001d014977 | -----                                                              | 0   |
|                |                                                                    |     |
| Bra000409      | HQLRNSEGNDGMFAYHAGGAQGMGAGSFG---SPSASMQ---PRKFFDSPQLQQ----         | 99  |
| Bol029571      | .....G.....LPQQ.....                                               | 104 |
| Bra039296      | Q.G...A.....P..V.....G.N.---S.G...QPQQ..RL.....Q.----              | 103 |
| Bol021767      | Q.G...A.....P..V.....G.N.---...G...HPQQ..RL.....Q..QQPQ            | 105 |
| AT2G46020      | Q.H...DT.EN...QP..V.....G.NFA---.SPG...MPQQS.N..E...Q..QQQQ        | 117 |
| Os02g0114033   | MMHHHDQQQQQQQ.PS.APH...G.GSSSFPPS.GP.PPFQGG.NMPLP-GGP.G---         | 93  |
| Zm00001d014977 | MMHHHEQQQ---.F.S.APH...P.GVN-FPQS.GPVSSFQGG.NLPL.SGGP.G---         | 52  |
|                | : : : : : : * . : * * * * * . : : : * . : *                        |     |
|                |                                                                    |     |
| Bra000409      | ---QHGEQQSINPMQAYIQFALQAQQQK-----AQQQARMGIMMGSSKQDAR               | 146 |
| Bol029571      | -----H.....                                                        | 151 |
| Bra039296      | --GSSQ....F.....L.....M.-.....                                     | 150 |
| Bol021767      | --GSSQD....F.....L.....V..H...M.-----                              | 143 |
| AT2G46020      | QGSSTQ...NF.....M..H.....MVG--.SVGKDQ                              | 156 |
| Os02g0114033   | ---LA.GQ.HNPTA...L.YMM.Q...--AHGMLLQQ...K.NMAGP.TR...VA            | 147 |
| Zm00001d014977 | --MV.GQMHNQVA...QFLKL.M.Q...QQKAAQGMLLQQ--.K.NMAGS..R..ML          | 107 |
|                |                                                                    |     |
| Bra000409      | MGVLNMQEMMPMQASNMAQASSSRPAG-----EQFSHGERQMESGPPQQRNETKPHP-QQ       | 199 |
| Bol029571      | .....T.....S.....LA.....G.....                                     | 204 |
| Bra039296      | ..M...GA.....Q..G...N.SA-----AR.....H.....                         | 199 |
| Bol021767      | -----GA.-Q...Q..G...N.SA-----AR.....H.....                         | 185 |
| AT2G46020      | DARMG.LN.QDLNP.SQP....KPSG-----D..AR...T..SS...S..Q..              | 210 |
| Os02g0114033   | ANTAK...L.SL..QAQ..MFKRQQSEHLQQAQEK.AEQ.QPSNSEQRSGDMRPPM.P.G       | 207 |
| Zm00001d014977 | NNPAK...L.ALH---Q..MYKRQCE-----KEQ.QSSGSEQRSGDMRPP-M.P.G           | 155 |
|                | : * . . . * . . . * : * . . . * *                                  |     |
|                |                                                                    |     |
| Bra000409      | VGTGQLMPGNI IREMQAPQAMQGVNMGTNQLALSQQWQAMQAWARERNIDLSHPANANQ       | 259 |
| Bol029571      | A.....K.....S...H.....T.....                                       | 264 |
| Bra039296      | .....GP.....F.....S.                                               | 259 |
| Bol021767      | .....T.....GP.....S...F.....S.                                     | 245 |
| AT2G46020      | .....M.....Q.L...N...FA.....S.                                     | 270 |
| Os02g0114033   | .PGQ..SSAGMV...PM.GQA.MS.A.A.PM.M-A.L.I...K.H.V...N...VTL          | 266 |
| Zm00001d014977 | ..GQ..PSMGM...PI.GQV.MGSA.G.PITP-T.F.I...K.H.F...N...ISA           | 214 |
|                | . ** . : : * * * . * . : * * : * * * * * * * * * * * * * * * * * * |     |
|                |                                                                    |     |
| Bra000409      | MAHIL----QGRMAAQKAIIEGNVASQSPTMPVSSQPVSSSALPGENSPRANSASDISGQ       | 315 |
| Bol029571      | .S.....A.....A.....V.....F...                                      | 320 |
| Bra039296      | .S.....V.....N.....SI.....S...GV.....P...G....                     | 315 |
| Bol021767      | .S.....SN.....P..SI.....S...GV.....P...G....                       | 301 |
| AT2G46020      | .....A.....G.....SI.I...A...VV.....H.....                          | 326 |
| Os02g0114033   | ISQ..PMLQSN...M..QN.VGM..QQ-SVP.QMN--NDA..HSNFPSQG.PSKPR.          | 322 |
| Zm00001d014977 | ISQL.PIWQSN...M..QN.ANM.A.QQQALP.QVN---DT..HVNAPSQG.LLKPR.         | 271 |
|                | : : : * . * * . * * * * * * * * * * * * * * * * * *                |     |





Fig. S1 (Cont.)

|                |                                                                |      |
|----------------|----------------------------------------------------------------|------|
| Bra000409      | FHDWFAQPFQREGPAHN-IEDDWLETEKKVIVIHRLHQILEPFMLRRRVEDVEGSLPPK-   | 1194 |
| Bo1029571      | .....-.....-                                                   | 1200 |
| Bra039296      | .....S.....-                                                   | 1201 |
| Bo1021767      | .....S.....-                                                   | 1187 |
| AT2G46020      | .....A.....-                                                   | 1212 |
| Os02g0114033   | .Q...SK...DV.T.SEE.....I.....R.V                               | 1178 |
| Zm00001d014977 | .S...SK...D..T..EE.....I.....R.-                               | 1159 |
|                | * **::**::*: * . *****:***** * *                               |      |
| Bra000409      | -----VSVVLRCRMSAIQSAVYDWIKATGTLRVDP                            | 1224 |
| Bo1029571      | -----                                                          | 1230 |
| Bra039296      | -----S.....                                                    | 1231 |
| Bo1021767      | -----S.....                                                    | 1217 |
| AT2G46020      | -----                                                          | 1242 |
| Os02g0114033   | DCSALVTLSDAICHSAFVCYIVNSSCHLQE.I.....G..G.I.....S...I....      | 1238 |
| Zm00001d014977 | -----D.I.....V.G.I.....S...I....                               | 1189 |
|                | *:*****:*. *:*****:***:****                                    |      |
| Bra000409      | DDEKLRAQKSSIIYQAKIYRTLNNRCMELRKT CNHPLLNYPYFNDLSKDFLVRSCGKLWIL | 1284 |
| Bo1029571      | .....T.....                                                    | 1290 |
| Bra039296      | .....K...NP.....K.....                                         | 1291 |
| Bo1021767      | .....K...NP.....K.....                                         | 1277 |
| AT2G46020      | .....NP.....A.....F.....                                       | 1302 |
| Os02g0114033   | E...A.I.RNAM...T.KN...K.....V.....S.FM.YYG...II.....N.         | 1298 |
| Zm00001d014977 | E...R...RNPM..V.T.KN...K.....V.....S.FL.-HG...MI.....N.        | 1248 |
|                | :*** : *:.:*. * *:***:*****.*****.***:*. * **::***** *         |      |
| Bra000409      | DRILIKLQRTGHRVLLFSTMTKLLDILEEYLQWRRLVYRRIDGTTSLLEDRESAIVDFNDP  | 1344 |
| Bo1029571      | .....                                                          | 1350 |
| Bra039296      | .....                                                          | 1351 |
| Bo1021767      | .....                                                          | 1337 |
| AT2G46020      | .....                                                          | 1362 |
| Os02g0114033   | .....H.S.....Q.....R.                                          | 1358 |
| Zm00001d014977 | .....HKS.....M.D.....R.                                        | 1308 |
|                | *****: :*****:*****:*****:*****:***** *                        |      |
| Bra000409      | DTDCFIFLLSIRAAGRGLNLQTDADTVVIYDPDPNPKNEEQAVARAHRIQGTREVKVIYME  | 1404 |
| Bo1029571      | .....                                                          | 1410 |
| Bra039296      | .....                                                          | 1411 |
| Bo1021767      | .....                                                          | 1397 |
| AT2G46020      | .....                                                          | 1422 |
| Os02g0114033   | NS.....S.....Q.....D.....                                      | 1418 |
| Zm00001d014977 | GS.....S.....Q.....                                            | 1368 |
|                | :*****:*****:*****:*****:*****:***** *                         |      |
| Bra000409      | AVVEKFSSHQKEDELRSRGGSIDVEDDLAGKDRYIGSIEGLIRNNIQQYKIDMADEVINAG  | 1464 |
| Bo1029571      | .....                                                          | 1470 |
| Bra039296      | .....I.....M.L.....L.....                                      | 1447 |
| Bo1021767      | .....M.....V.L.....                                            | 1457 |
| AT2G46020      | .....L.....V.L...M.....                                        | 1482 |
| Os02g0114033   | ...DNI..Y.....N..G.L.....M...S.....                            | 1478 |
| Zm00001d014977 | ...DNI..Y.....N..G.L.....M.....                                | 1428 |
|                | ***: : **::*****.*** *:***:**** :****                          |      |
| Bra000409      | RFDQRTTHEERRMTLETLLHDEERYQETVHDVPSLHEVNRMIARSEEEVELFDQMDEEFD   | 1524 |
| Bo1029571      | .....                                                          | 1530 |
| Bra039296      | .....D.....                                                    | 1507 |
| Bo1021767      | .....                                                          | 1517 |
| AT2G46020      | .....                                                          | 1542 |
| Os02g0114033   | .....QQ.....T.....                                             | 1538 |
| Zm00001d014977 | .....DS.....Q.....T.S.....D..                                  | 1488 |
|                | *****:*****:*****:*****:*****:***** *                          |      |
